# Supplementary material
Source: publisher figshare collection journal article supplement (https://tandf.figshare.com/ndownloader/files/38558291)

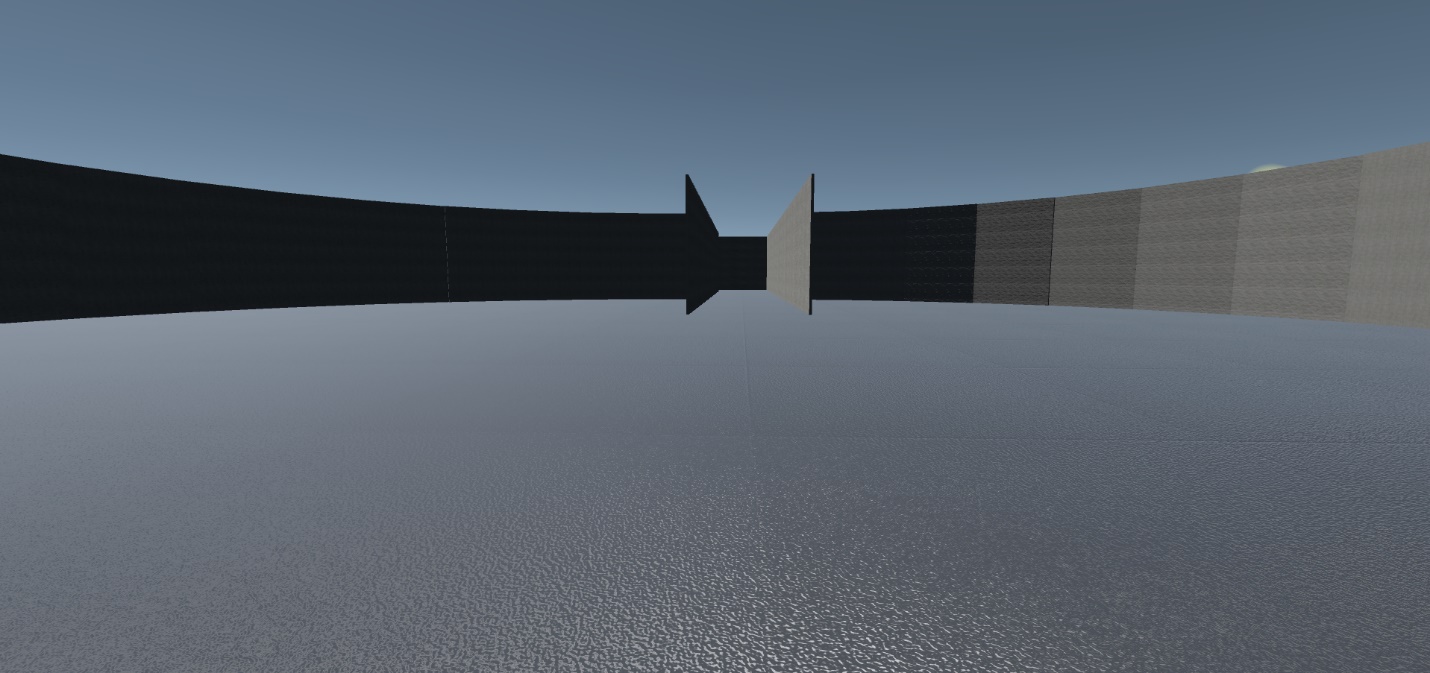


Supplemental 1: Image of the training environment in Experiments 1 and 3

Supplement: Supplementary file 1 [file 38558291]
